# Supplementary material for: Synthesis, In Vitro, In Vivo and In Silico Antidiabetic Bioassays of 4-Nitro(thio)phenoxyisobutyric Acids Acting as Unexpected PPARγ Modulators: An In Combo Study
Source: MDPI journal article supplement (doi:10.3390/ph15010102), 2022-01-15
Supplement: s1 [file s1]

Supplemental info

# Synthesis, *in vitro*, *in vivo* and *in silico* antidiabetic bioassays of 4-nitro(thio)phenoxyisobutyric acids acting as unexpected PPAR $\gamma$ modulators: an *in combo* study

Blanca Colin-Lozano,<sup>1,2</sup> Héctor Torres-Gomez,<sup>1,3</sup> Sergio Hidalgo-Figueroa,<sup>1,4</sup> Fabiola Chavez-Silva,<sup>1</sup> Samuel Estrada-Soto,<sup>1</sup> Julio Cesar Almanza-Pérez,<sup>5</sup> and Gabriel Navarrete-Vazquez <sup>1,\*</sup>

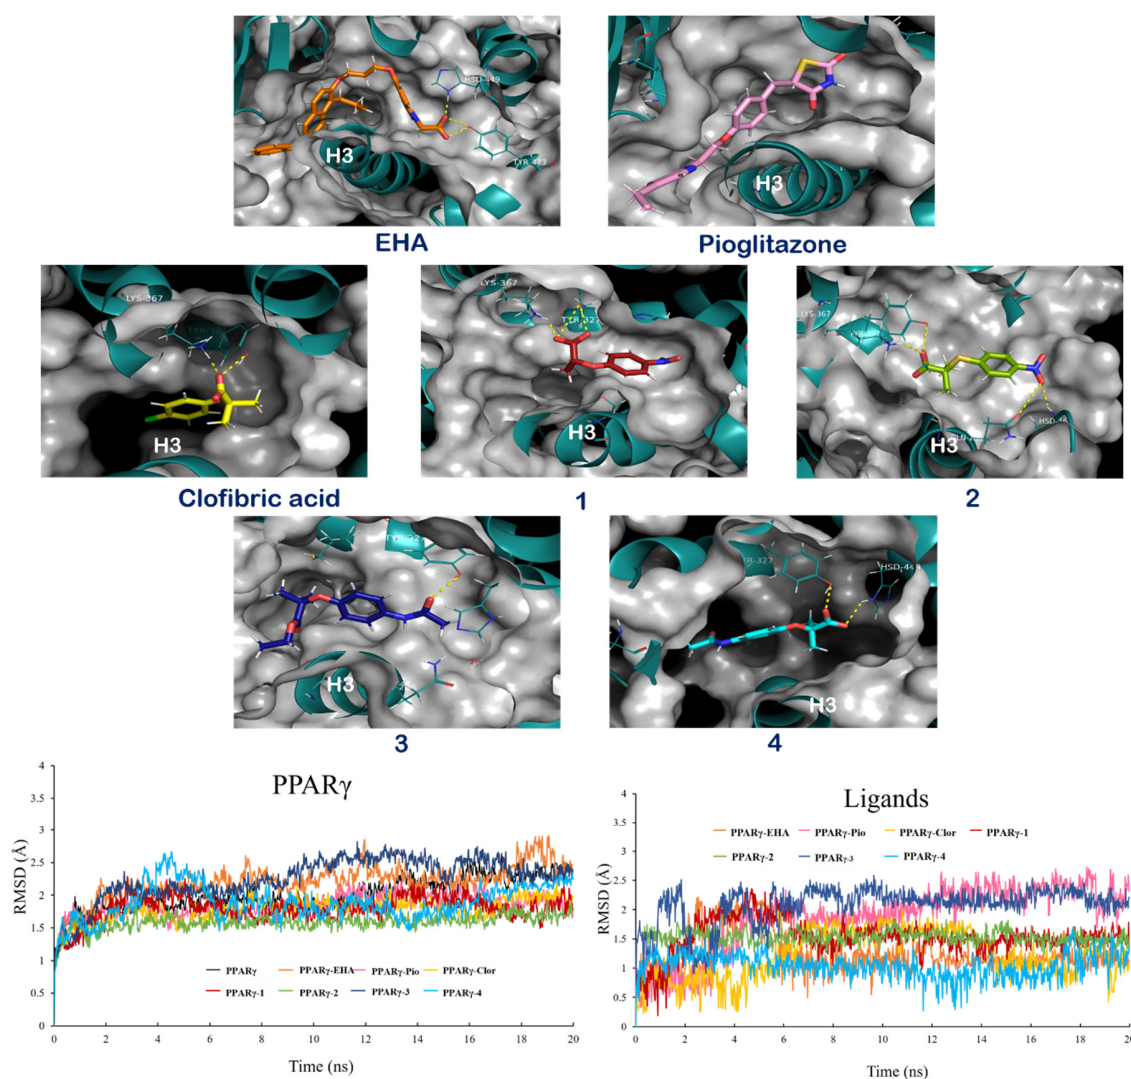

**Figure S1.** Hydrogen-bonding network of EHA (orange), Pioglitazone (pink), Clofibric acid (yellow) and compounds 1-4 (red, green, deep blue and cyan, respectively) in the binding pocket of PPAR $\gamma$  (PDB code: 2F4B); RMSD of Protein and Ligands.
